# Supplementary material for: Facile synthesis of hair-extract-capped gold and silver nanoparticles and their biological applications
Source: Royal Society of Chemistry journal article supplement (doi:10.1039/c6ra21455j), 2016-01-01
Supplement: c6ra21455j1.pdf [file c6ra21455j1.pdf]

## Facile Synthesis of Hair Extract Caped Gold and Silver Nanoparticles and their Biological Applications

Rohullah<sup>b</sup>, Andaleeb Azam<sup>c</sup>, Shanlin Qiao<sup>a</sup>, Mazharul Islam<sup>e</sup>, Javed Ali<sup>b</sup>, Abdul Wahab<sup>d</sup>, Murad Ali Khan<sup>b</sup>, Farhan<sup>b</sup>, and Abdul Hameed

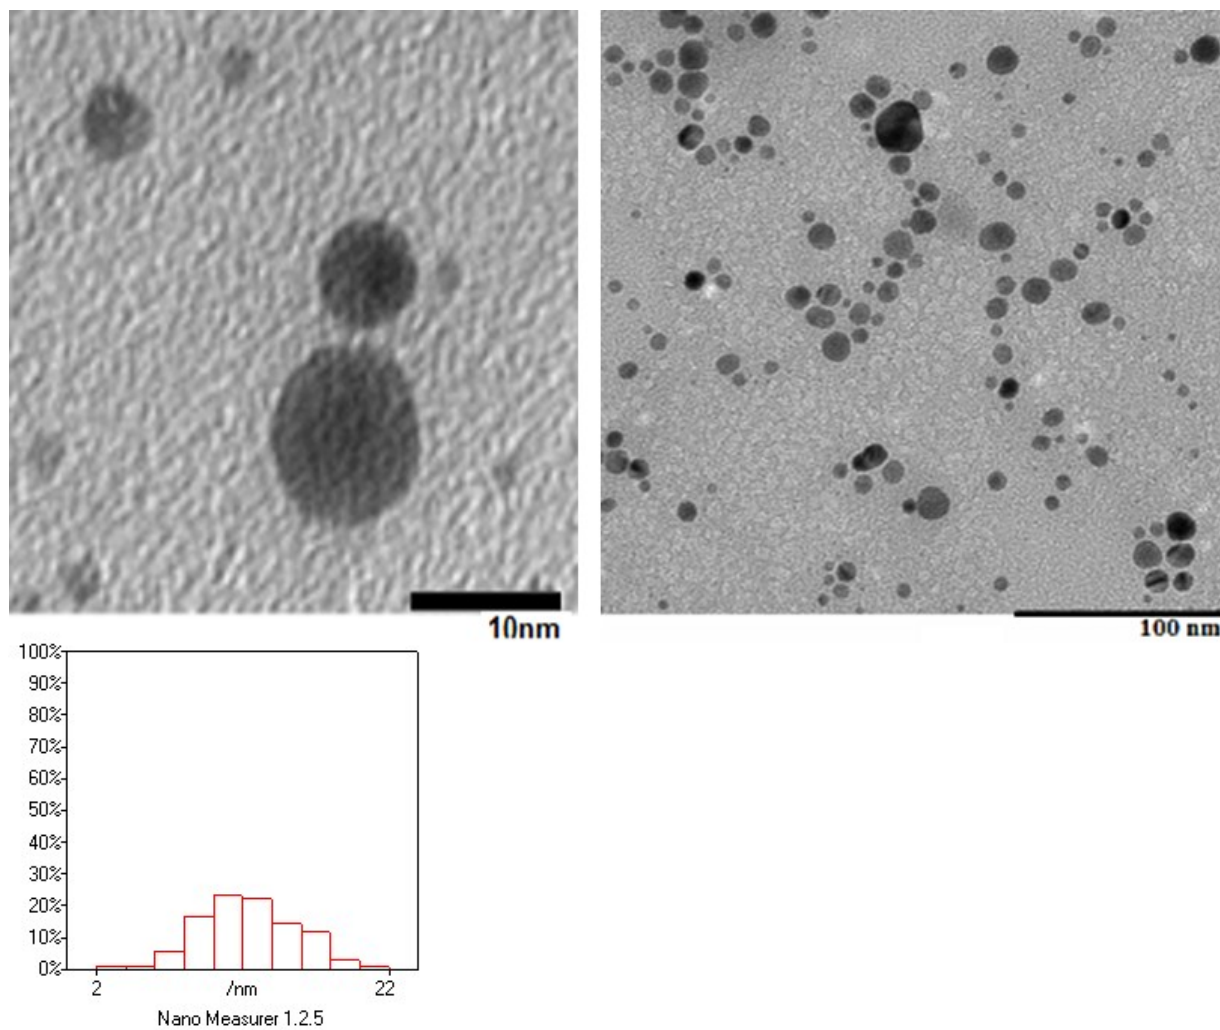

**Figure S-1:** TEM images of AuHR.

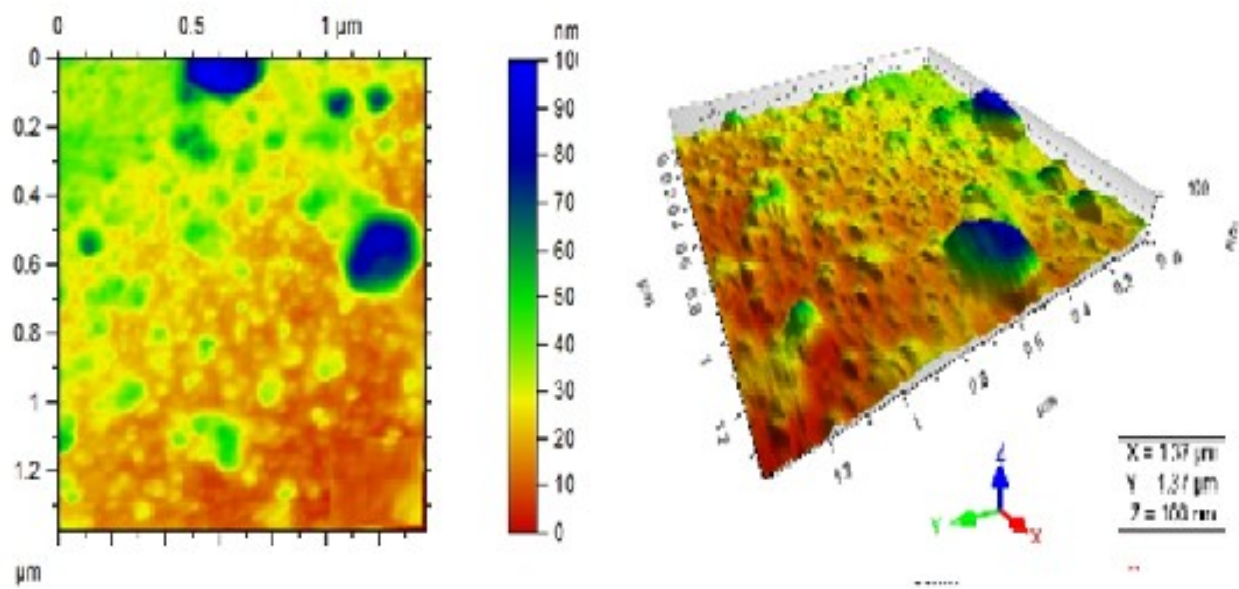

**Figure S-2:** AFM images of AuHr.

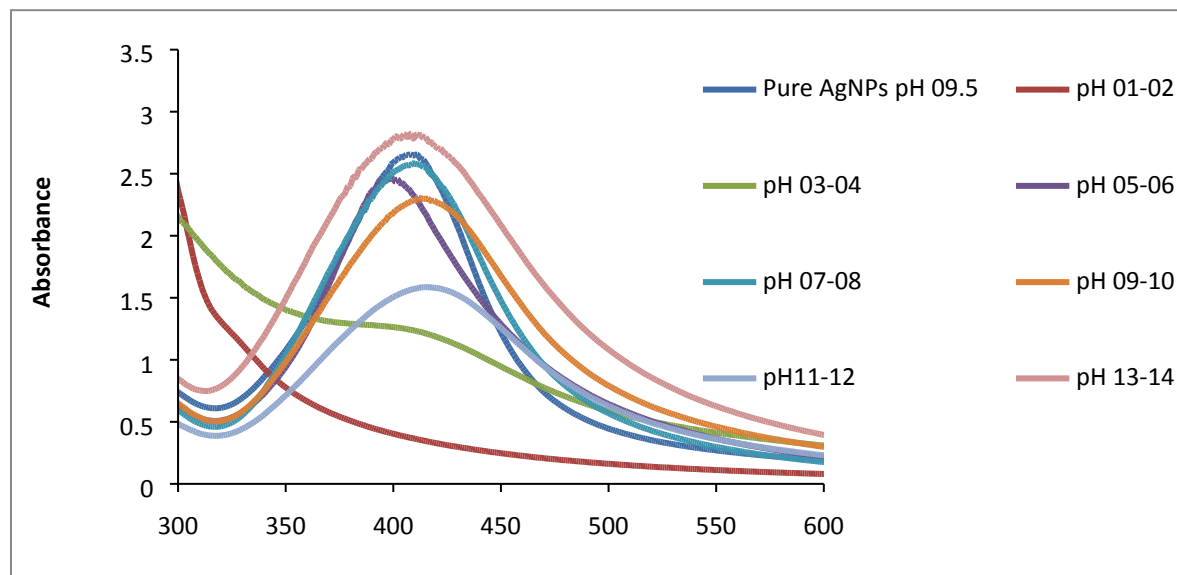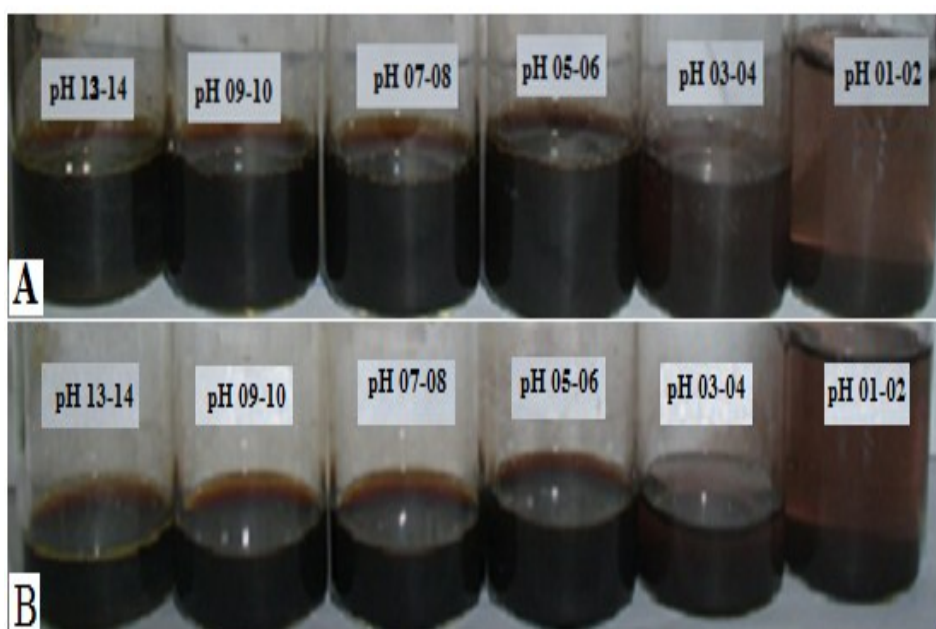

**Figure S-3:** pH stability of AgHr. “B” concentrated and “A” diluted.

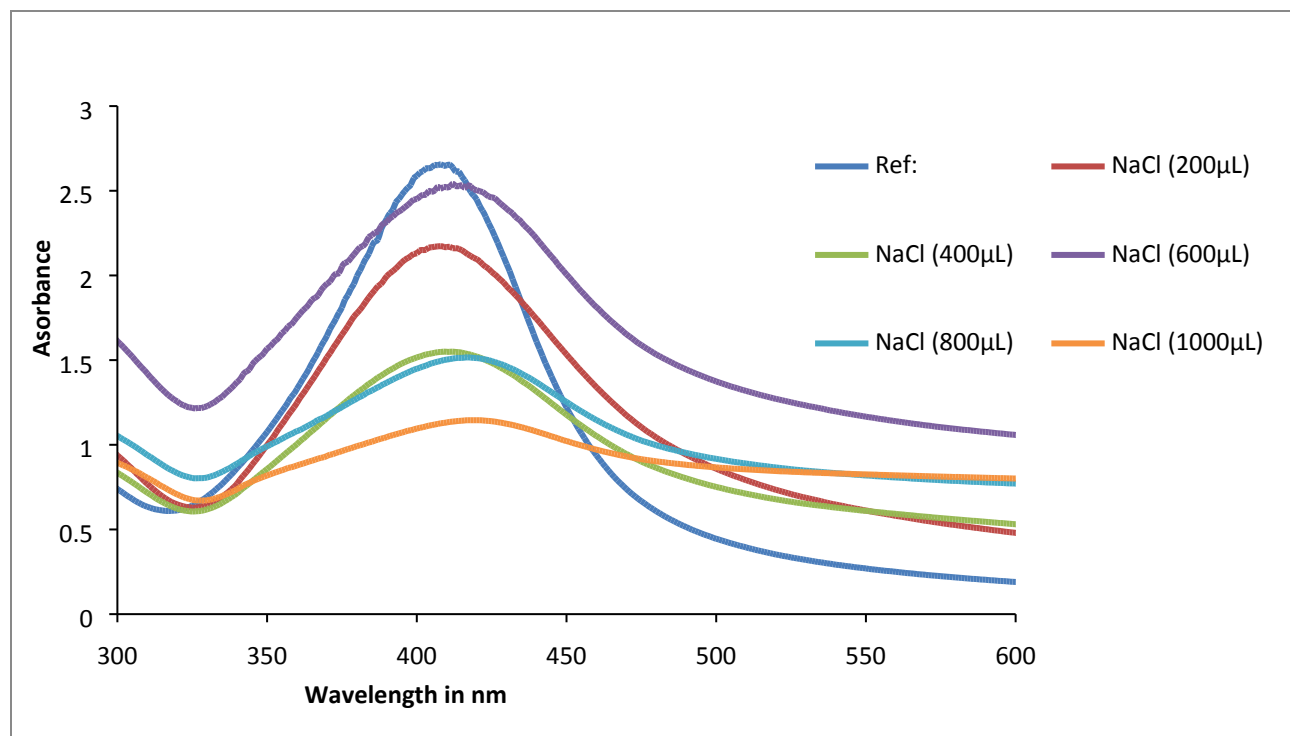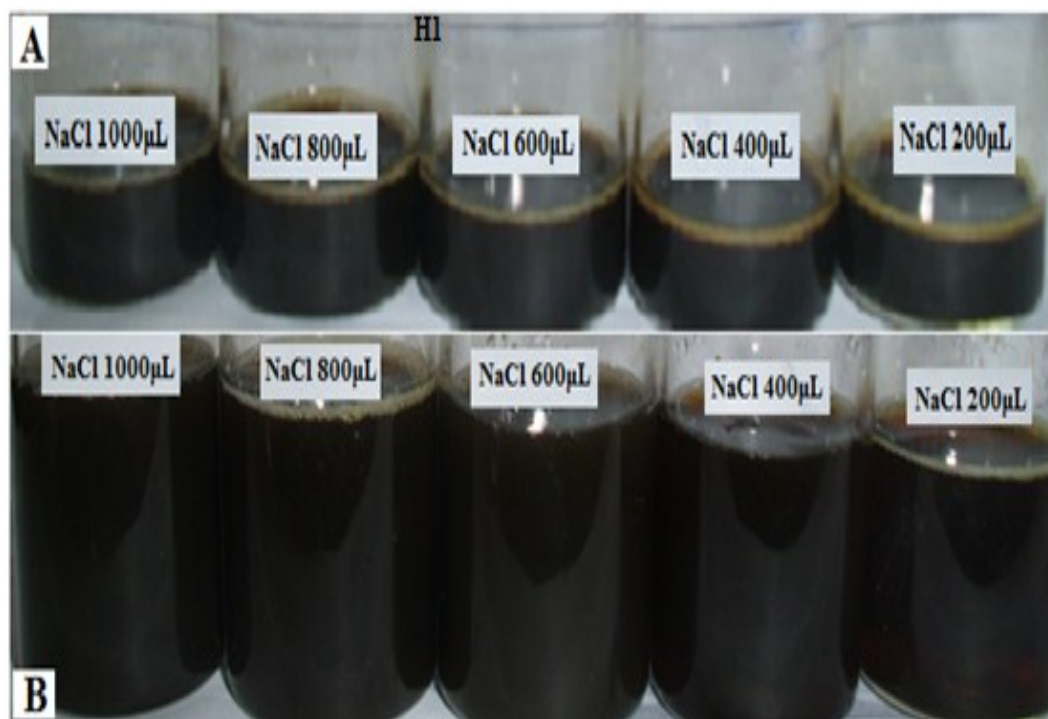

**Figure S-4:** Salt stability of AgHr against NaCl solution. “A” concentrated and “B” diluted.

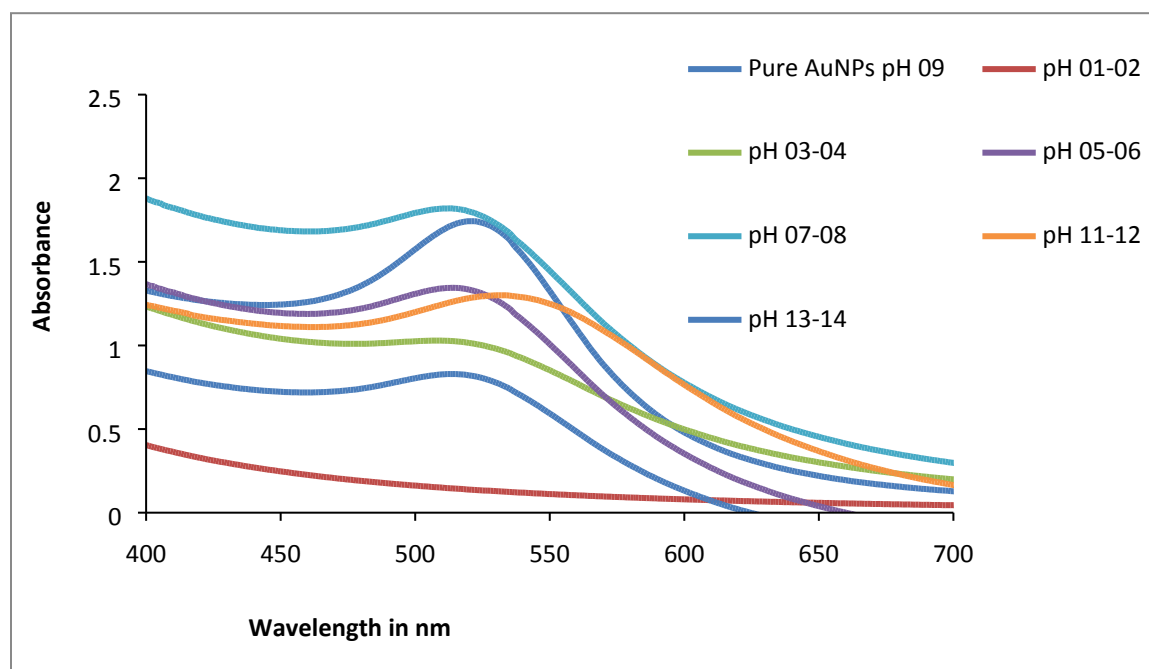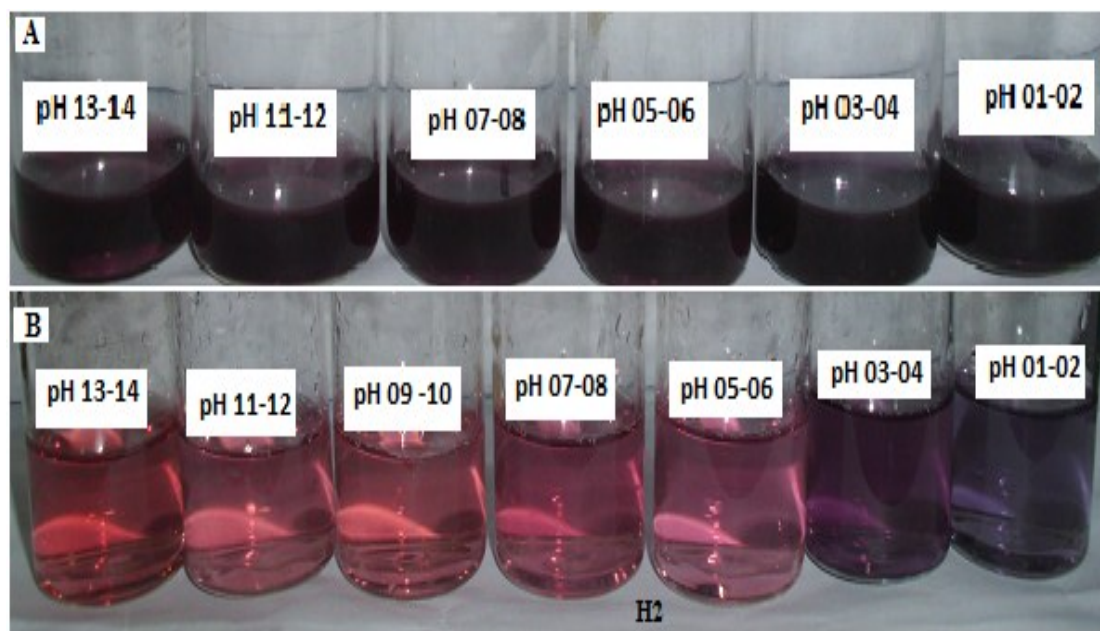

**Figure S-5&6:** pH stability of AuHr.

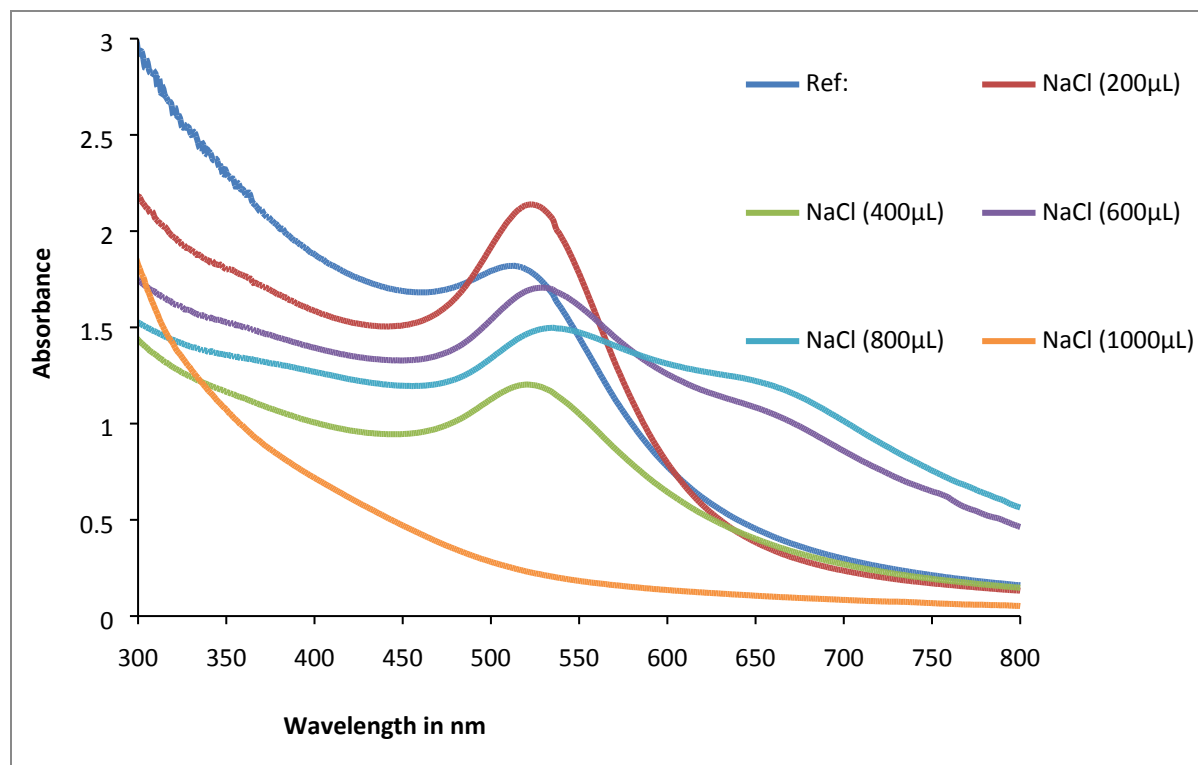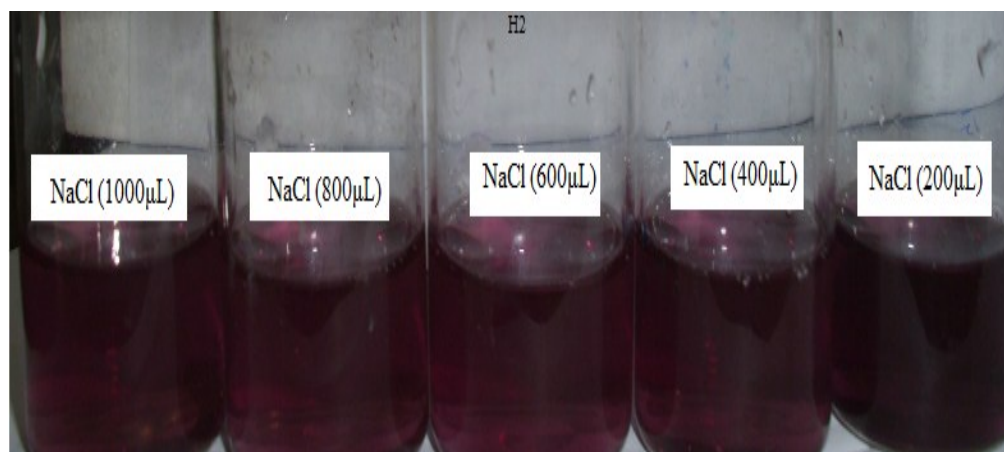

**Figure S-7&8:** Salt stability AgHr.

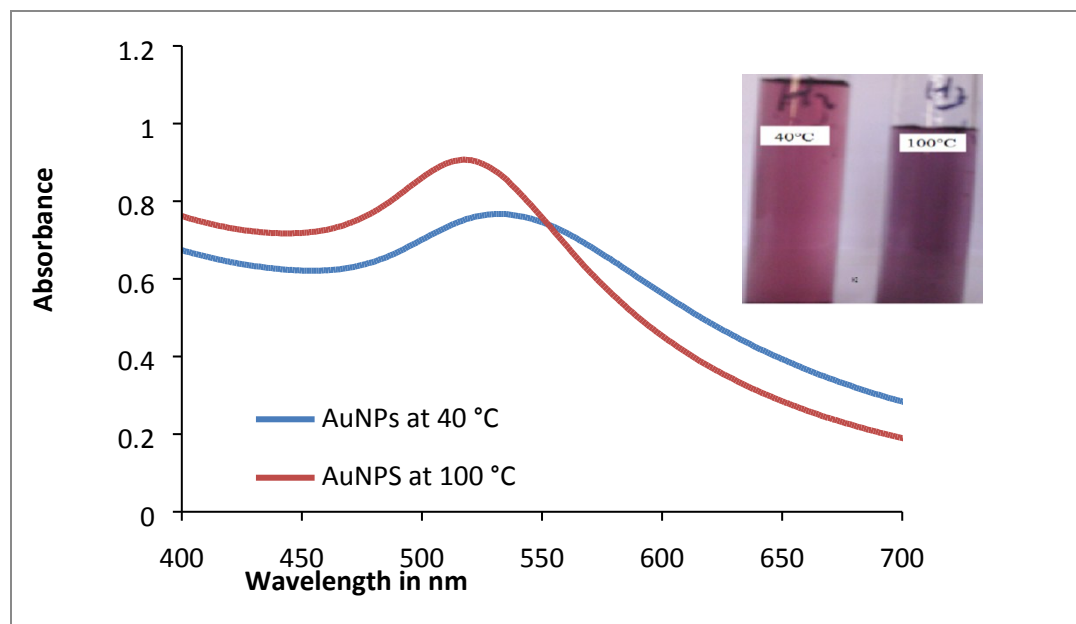

**Figure S-9:** Heat stability of AgHr.

**Table S-1.** Presents urease inhibition activities of hairs' extract, Ag and Au nanoparticles.

| Enzymes inhibition activities |                                                               | Hairs' extract  | H.Ext-AuNPs      | Blank AuNPs | H.Ext AgNPs     | Blank AgNPs | Standard ( $\mu\text{g}/\text{mL}$ ) (thiourea) |
|-------------------------------|---------------------------------------------------------------|-----------------|------------------|-------------|-----------------|-------------|-------------------------------------------------|
| Urease                        | %Inhibition                                                   | 99.2            | 65.0             | 9.5         | 96.5            | 41          | 99.8                                            |
|                               | $\text{IC}_{50} \pm \text{S.E.M}$ ( $\mu\text{g}/\text{mL}$ ) | $32.1 \pm 0.57$ | $119.3 \pm 1.01$ | N/A         | $58.0 \pm 1.03$ | N/A         | $21.2 \pm 1.3$                                  |

**Table S-2:** Xanthine oxidase inhibition activities of hairs' extract Ag and Au nanoparticles

| Enzymes inhibition activities |                                                        | Hairs' extract | H.Ext-AuNPs    | Blank AuNPs | H.Ext AgNPs     | Blank AgNPs | Standard ( $\mu\text{g/mL}$ ) (Allopurinol) |
|-------------------------------|--------------------------------------------------------|----------------|----------------|-------------|-----------------|-------------|---------------------------------------------|
| Xanthine Oxidase              | %Inhibition                                            | 41             | 92.4           | 2.0         | 83.1            | 9.5         | 99.6                                        |
|                               | $\text{IC}_{50} \pm \text{S.E.M}$ ( $\mu\text{g/mL}$ ) | N/A            | $3.0 \pm 0.01$ | N/A         | $3.71 \pm 0.05$ | N/A         | $0.47 \pm 0.03$                             |

**Table S-3.** The antibacterial activities of biomaterials' extract stabilized Ag & Au NPs.

| Nanoparticles and drug | Bacterial Species |                      |                  |                      |
|------------------------|-------------------|----------------------|------------------|----------------------|
|                        | <i>E. coli</i>    | <i>P. aeruginosa</i> | <i>S. aureus</i> | <i>K. pneumoniae</i> |
| H.Ext-AgNPs            | 50 %              | 60 %                 | 50 %             | 57 %                 |
|                        | $08 \pm 0.66$ mm  | $06 \pm 0.33$ mm     | $09 \pm 0.68$ mm | $08 \pm 0.39$ mm     |
| H.Ext-AuNPs            | 45 %              | 80 %                 | 50 %             | 57 %                 |
|                        | $07 \pm 0.33$ mm  | $08 \pm 0.79$ mm     | $09 \pm 0.13$ mm | $08 \pm 0.57$ mm     |
| Standard Drug          | 100%              | 100%                 | 100%             | 100%                 |
|                        | $16 \pm 0.33$ mm  | $10 \pm 0.21$ mm     | $18 \pm 0.28$ mm | $14 \pm 0.13$ mm     |
